# Supplementary material for: Corneal Behavior during Tonometer Measurement during the Water Drinking Test in Eyes with XEN GelStent in Comparison to Non-Implanted Eyes
Source: MDPI journal article supplement (doi:10.3390/jcm11112962), 2022-05-24
Supplement: s1 [file s1]

**Table S1.** Demographic and clinical characteristics of the study groups (XEN group and Control group). All PARTICIPANTS have bilateral POAG. One eye of each patient was assigned to the XEN group and the other to the Control group (the POAG group).

|                                           | XEN Group<br>n = 18 |              | Control Group<br>n = 18 |              | p-Value<br>* |
|-------------------------------------------|---------------------|--------------|-------------------------|--------------|--------------|
|                                           | Mean $\pm$ SD       | 95% CI       | Mean $\pm$ SD           | 95% CI       |              |
| SE [D]                                    | -0.75 $\pm$ 1.0     | -2.5–1.50    | -0.25 $\pm$ 0.75        | -2.5–1.75    | 0.59         |
| CCT [ $\mu$ m]                            | 534 $\pm$ 36        | 521–548      | 535 $\pm$ 41            | 516–555      | 0.51         |
| ACD [ $\mu$ m]                            | 3.24 $\pm$ 0.77     | 2.91–3.57    | 3.01 $\pm$ 0.72         | 2.56–3.46    | 0.57         |
| AXL [ $\mu$ m]                            | 23.9 $\pm$ 1.7      | 23.1–24.4    | 23.1 $\pm$ 1.4          | 22.9–24.1    | 0.73         |
| BCVA [logMAR]                             | 0.06 $\pm$ 0.10     | -0.02–0.22   | 0.08 $\pm$ 0.12         | 0.00–0.20    | 0.81         |
| MD [dB]                                   | -8.8 $\pm$ 8.1      | -11.7 – -6.5 | -8.7 $\pm$ 8.5          | -13.3 – -4.3 | 0.92         |
| PSD [dB]                                  | 6.1 $\pm$ 4.1       | 4.9– 7.2     | 6.1 $\pm$ 3.9           | 4.1–8.1      | 0.74         |
| RNFLT [ $\mu$ m]                          | 62 $\pm$ 11         | –            | 64 $\pm$ 14             | –            | 0.87         |
| Number of patients on topical medication  | 3                   |              | 18                      |              | –            |
| Number of patients on systemic medication | 0                   |              | 0                       |              | –            |

Mann-Whitney U test; CCT - central corneal thickness, ACD - anterior chamber depth, AXL - axial length of the globe, BCVA - best-corrected visual acuity, MD - mean deviation (perimetry), PSD - pattern standard deviation (perimetry), RNFLT - retinal nerve fiber layer thickness, SE-spherical equivalent

**Table S2.** Variables and definitions of the corneal deformation signal parameters obtained by Ocular Response Analyzer

| Variable         | Description                                                                                                   |
|------------------|---------------------------------------------------------------------------------------------------------------|
| IOPg [mmHg]      | Goldmann correlated intraocular pressure                                                                      |
| IOPcc [mmHg]     | Corneal compensated intraocular pressure                                                                      |
| CH [mmHg]        | Corneal hysteresis; parameter describing corneal viscosity                                                    |
| CRF [mmHg]       | Corneal resistance factor                                                                                     |
| WS               | Waveform score - quality factor informing about the reliability of the measurement                            |
| aindex, bindex   | Smoothness – Degree of “non-monotonicity” of rising and falling edges of peak1 and peak2 (normalized by area) |
| p1area, p2area   | Area of peak1 or peak2 (sum of values) derived from upper 75% of applanation peak                             |
| p1area1, p2area1 | Area of peak1 or peak2 (sum of values) derived from upper 50% of applanation peak                             |



|                                   |         |             |             |             |             |             |                     |
|-----------------------------------|---------|-------------|-------------|-------------|-------------|-------------|---------------------|
| <b>aindex</b>                     | Control | 8.4 ± 0.9   | 8.8 ± 1.2   | 8.3 ± 1.5   | 8.2 ± 1.2   | 8.7 ± 1.3   | 0.78 IV             |
|                                   | XEN-Gel | 8.7 ± 1.3   | 8.8 ± 0.7   | 8.2 ± 1.1   | 8.8 ± 0.6   | 8.8 ± 0.9   | 0.37 IV             |
| <b>p1area</b>                     | Control | 4200 ± 1300 | 3800 ± 1100 | 3800 ± 1400 | 3340 ± 990  | 3100 ± 1100 | <0.001 III          |
|                                   | XEN-Gel | 4200 ± 1500 | 3900 ± 1000 | 3800 ± 1100 | 3400 ± 1000 | 3400 ± 1100 | <0.05 IV            |
| <b>p1area1</b>                    | Control | 1800 ± 630  | 1620 ± 510  | 1640 ± 690  | 1370 ± 460  | 1350 ± 510  | <0.001 III          |
|                                   | XEN-Gel | 1800 ± 790  | 1660 ± 510  | 1580 ± 540  | 1450 ± 460  | 1420 ± 490  | <0.05 III           |
| <b>aspect1</b>                    | Control | 18.4 ± 4.6  | 16.9 ± 5.6  | 15.3 ± 5.4  | 13.6 ± 5.1  | 12.8 ± 5.4  | <0.001 III          |
|                                   | XEN-Gel | 17.4 ± 6.2  | 16.7 ± 4.7  | 15.2 ± 5.4  | 13.8 ± 6.0  | 13.4 ± 6.2  | <0.05 III           |
| <b>aspect11</b>                   | Control | 24.5 ± 7.5  | 23 ± 9.6    | 20.6 ± 6.3  | 18.3 ± 6.2  | 17 ± 7.5    | <0.005 III          |
|                                   | XEN-Gel | 22.5 ± 8.4  | 21.9 ± 7.1  | 20.3 ± 7.9  | 18.5 ± 9.8  | 17 ± 8.5    | <0.05 IV            |
| <b>h1</b>                         | Control | 420 ± 100   | 390 ± 110   | 370 ± 120   | 320 ± 100   | 300 ± 110   | <0.001 III          |
|                                   | XEN-Gel | 400 ± 130   | 382 ± 93    | 360 ± 110   | 330 ± 110   | 320 ± 120   | <0.01 III           |
| <b>h11</b>                        | Control | 279 ± 69    | 257 ± 75    | 245 ± 83    | 217 ± 66    | 202 ± 74    | <0.001 III          |
|                                   | XEN-Gel | 268 ± 85    | 255 ± 62    | 242 ± 73    | 218 ± 77    | 211 ± 80    | <0.01 III           |
| <b>w1</b>                         | Control | 23.3 ± 2.1  | 23.6 ± 2.2  | 24.8 ± 2.5  | 25.6 ± 4.4  | 25.3 ± 4.3  | <b>0.13 IV</b>      |
|                                   | XEN-Gel | 24.4 ± 3.3  | 23.7 ± 2.2  | 24.8 ± 2.8  | 25 ± 2.9    | 25.1 ± 3.5  | <b>&lt;0.05 IV</b>  |
| <b>w11</b>                        | Control | 12.2 ± 2    | 12.6 ± 2.2  | 12.9 ± 2.4  | 13.5 ± 3.3  | 13.7 ± 4.1  | 0.72 IV             |
|                                   | XEN-Gel | 13.2 ± 2.7  | 12.6 ± 1.9  | 13 ± 2.7    | 13.3 ± 2.9  | 13.8 ± 2.8  | 0.47 III            |
| <b>uslope1</b>                    | Control | 71 ± 21     | 65 ± 23     | 61 ± 17     | 56 ± 19     | 48 ± 21     | <0.001 III          |
|                                   | XEN-Gel | 68 ± 21     | 62 ± 18     | 58 ± 20     | 56 ± 29     | 51 ± 27     | <0.05 IV            |
| <b>uslope11</b>                   | Control | 65 ± 20     | 62 ± 27     | 56 ± 17     | 55 ± 22     | 46 ± 21     | <0.05 III           |
|                                   | XEN-Gel | 62 ± 17     | 58 ± 16     | 57 ± 22     | 51 ± 26     | 49 ± 23     | <0.05 IV            |
| <b>dslope1</b>                    | Control | 26 ± 7      | 24 ± 8      | 21 ± 8      | 19 ± 8      | 18 ± 8      | <0.001 III          |
|                                   | XEN-Gel | 25 ± 9      | 24 ± 8      | 22 ± 8      | 19 ± 8      | 19 ± 9      | <0.05 IV            |
| <b>dslope11</b>                   | Control | 41 ± 13     | 38 ± 17     | 33 ± 12     | 29 ± 11     | 28 ± 13     | <0.005 III          |
|                                   | XEN-Gel | 37 ± 15     | 37 ± 15     | 34 ± 16     | 29 ± 15     | 27 ± 13     | <0.05 III           |
| <b>dive1</b>                      | Control | 320 ± 100   | 320 ± 110   | 310 ± 120   | 266 ± 92    | 250 ± 120   | <0.05 III           |
|                                   | XEN-Gel | 340 ± 120   | 321 ± 78    | 320 ± 110   | 270 ± 110   | 270 ± 120   | <0.05 III           |
| <b>path1</b>                      | Control | 21.7 ± 3.9  | 21 ± 3.8    | 20.6 ± 3.5  | 20.7 ± 3.8  | 20.4 ± 6.3  | 0.71 IV             |
|                                   | XEN-Gel | 20.1 ± 2.8  | 20.2 ± 2.8  | 20.5 ± 3.9  | 19.3 ± 3.3  | 19.3 ± 3.4  | 0.35 III            |
| <b>path11</b>                     | Control | 31.5 ± 5.4  | 32 ± 8      | 30.4 ± 7.8  | 31.9 ± 7.2  | 30.1 ± 10.1 | 0.58 IV             |
|                                   | XEN-Gel | 30.2 ± 5.5  | 30.2 ± 6.2  | 31.3 ± 9.7  | 28.1 ± 4.4  | 29.2 ± 7.6  | 0.43 IV             |
| <b>mslew1</b>                     | Control | 119 ± 33    | 108 ± 33    | 103 ± 32    | 93 ± 30     | 82 ± 33     | <0.01 IV            |
|                                   | XEN-Gel | 116 ± 37    | 107 ± 33    | 101 ± 33    | 92 ± 40     | 87 ± 41     | <0.05 IV            |
| <b>slew1</b>                      | Control | 69 ± 20     | 67 ± 26     | 63 ± 17     | 57 ± 20     | 49 ± 24     | <b>&lt;0.01 III</b> |
|                                   | XEN-Gel | 69 ± 21     | 63 ± 19     | 62 ± 20     | 57 ± 29     | 51 ± 28     | <b>0.05 IV</b>      |
| <b>Second applanation (peak2)</b> |         |             |             |             |             |             |                     |
| <b>bindex</b>                     | Control | 8.7 ± 1.3   | 8.6 ± 1.1   | 8.2 ± 1.6   | 8.3 ± 1.5   | 9.0 ± 0.9   | 0.18 IV             |
|                                   | XEN-Gel | 8.9 ± 1.2   | 8.8 ± 0.8   | 8.4 ± 1.3   | 8.4 ± 1.4   | 8.7 ± 1.3   | 0.27 IV             |

|                 |         |            |            |             |             |             |                      |
|-----------------|---------|------------|------------|-------------|-------------|-------------|----------------------|
| <b>p2area</b>   | Control | 2480 ± 740 | 2350 ± 670 | 2280 ± 590  | 2390 ± 700  | 2210 ± 680  | 0.06 III             |
|                 | XEN-Gel | 2250 ± 650 | 2400 ± 710 | 2290 ± 600  | 2200 ± 730  | 2340 ± 760  | 0.39 III             |
| <b>p2area1</b>  | Control | 1050 ± 370 | 980 ± 290  | 940 ± 270   | 1000 ± 310  | 950 ± 320   | 0.09 III             |
|                 | XEN-Gel | 950 ± 280  | 1010 ± 320 | 940 ± 260   | 910 ± 310   | 990 ± 350   | 0.33 III             |
| <b>aspect2</b>  | Control | 17.5 ± 5   | 16.7 ± 6.1 | 14.7 ± 6.4  | 14.9 ± 6.2  | 13.6 ± 6.2  | <0.05 III            |
|                 | XEN-Gel | 19.4 ± 6.4 | 17.6 ± 4.9 | 15.3 ± 5.2  | 13.4 ± 5.8  | 14.1 ± 7.0  | <0.001 III           |
| <b>aspect21</b> | Control | 25.6 ± 8.6 | 24.3 ± 9   | 22.8 ± 10.2 | 21.2 ± 8.6  | 18.4 ± 8.6  | <0.05 IV             |
|                 | XEN-Gel | 28.5 ± 9.9 | 25 ± 7.5   | 22.3 ± 8.7  | 19.4 ± 10.1 | 19.8 ± 11.9 | <0.005 IV            |
| <b>h2</b>       | Control | 319 ± 66   | 304 ± 91   | 286 ± 78    | 283 ± 77    | 259 ± 88    | <0.01 III            |
|                 | XEN-Gel | 316 ± 78   | 310 ± 63   | 285 ± 70    | 254 ± 73    | 268 ± 89    | <0.01 III            |
| <b>h21</b>      | Control | 213 ± 44   | 203 ± 61   | 191 ± 52    | 189 ± 51    | 173 ± 58    | <0.01 III            |
|                 | XEN-Gel | 210 ± 52   | 207 ± 42   | 190 ± 47    | 169 ± 49    | 178 ± 60    | <0.005 III           |
| <b>w2</b>       | Control | 20.1 ± 3.3 | 20.3 ± 3.4 | 21.5 ± 4.1  | 21.8 ± 4.8  | 21.7 ± 4.5  | <b>0.19 III</b>      |
|                 | XEN-Gel | 19.2 ± 4   | 19.6 ± 3.9 | 21.5 ± 4.9  | 22 ± 5.2    | 22 ± 5.5    | <b>&lt;0.01 IV</b>   |
| <b>w21</b>      | Control | 9.6 ± 2    | 9.8 ± 2.3  | 10.4 ± 2.4  | 10.8 ± 3.3  | 11.3 ± 3.2  | <b>0.18 IV</b>       |
|                 | XEN-Gel | 9.0 ± 2.0  | 9.5 ± 2.4  | 10.5 ± 2.9  | 11.0 ± 3.1  | 11.4 ± 3.7  | <b>&lt;0.005 III</b> |
| <b>uslope2</b>  | Control | 82 ± 23    | 82 ± 30    | 81 ± 33     | 70 ± 24     | 65 ± 30     | <0.05 III            |
|                 | XEN-Gel | 92 ± 27    | 89 ± 26    | 78 ± 27     | 60 ± 24     | 64 ± 28     | <0.001 III           |
| <b>uslope21</b> | Control | 41 ± 16    | 38 ± 14    | 33 ± 16     | 33 ± 15     | 28 ± 15     | <b>0.13 III</b>      |
|                 | XEN-Gel | 73 ± 28    | 72 ± 24    | 64 ± 24     | 47 ± 18     | 51 ± 19     | <b>&lt;0.001 III</b> |
| <b>dslope2</b>  | Control | 23 ± 7     | 22 ± 8     | 19 ± 9      | 19 ± 8      | 17 ± 8      | <0.05 III            |
|                 | XEN-Gel | 26 ± 10    | 23 ± 7     | 20 ± 6      | 17 ± 8      | 19 ± 9      | <0.05 III            |
| <b>dslope21</b> | Control | 68 ± 16    | 66 ± 27    | 67 ± 28     | 61 ± 21     | 54 ± 25     | <0.05 IV             |
|                 | XEN-Gel | 45 ± 20    | 37 ± 11    | 34 ± 15     | 30 ± 18     | 31 ± 22     | <0.05 IV             |
| <b>dive2</b>    | Control | 235 ± 68   | 236 ± 86   | 222 ± 73    | 217 ± 66    | 198 ± 70    | <b>0.10 IV</b>       |
|                 | XEN-Gel | 243 ± 93   | 242 ± 69   | 208 ± 55    | 188 ± 66    | 204 ± 70    | <b>&lt;0.05 III</b>  |
| <b>path2</b>    | Control | 25.3 ± 4.8 | 25 ± 4.2   | 25.1 ± 5.2  | 23.4 ± 4.5  | 22.2 ± 5.1  | <0.05 III            |
|                 | XEN-Gel | 27.5 ± 6.3 | 25.8 ± 4.8 | 24.6 ± 5.3  | 23.2 ± 4.8  | 22.9 ± 5.8  | <0.005 IV            |
| <b>path21</b>   | Control | 36.7 ± 6.6 | 35.4 ± 5.6 | 37 ± 7.1    | 35.1 ± 8.2  | 32.2 ± 7.5  | <b>0.07 IV</b>       |
|                 | XEN-Gel | 37.2 ± 8.3 | 35.7 ± 5.5 | 35.8 ± 8.1  | 33.1 ± 6.8  | 32 ± 7.8    | <b>&lt;0.05 III</b>  |
| <b>mslew2</b>   | Control | 133 ± 30   | 130 ± 39   | 121 ± 38    | 114 ± 38    | 106 ± 40    | <0.01 III            |
|                 | XEN-Gel | 137 ± 27   | 137 ± 28   | 122 ± 36    | 102 ± 32    | 107 ± 45    | <0.001 IV            |
| <b>slew2</b>    | Control | 82 ± 22    | 84 ± 29    | 83 ± 32     | 72 ± 23     | 65 ± 29     | <0.05 III            |
|                 | XEN-Gel | 92 ± 27    | 90 ± 27    | 81 ± 28     | 61 ± 23     | 65 ± 27     | <0.001 III           |
